# Supplementary material for: Preparation of Non-Isocyanate Polyurethanes from Mixed Cyclic-Carbonated Compounds: Soybean Oil and CO2-Based Poly(ether carbonate)
Source: MDPI journal article supplement (doi:10.3390/polym16081171), 2024-04-21
Supplement: s1 [file s1]

## Supplementary Material

# Preparation of Non-Isocyanate Polyurethanes from Mixed Cyclic-Carbonated Compounds: Soybean Oil and CO<sub>2</sub>-Based Poly(ether carbonate)

**Table S1.** Examples of CSBO-based NIPU

| Amine                                          | [CC]:[NH <sub>2</sub> ] | Tensile strength (MPa) | Elongation at break (%) | Reference |
|------------------------------------------------|-------------------------|------------------------|-------------------------|-----------|
| 1,2-ethylenediamine                            | 1:0.5                   | 0.49                   | 72                      | [1]       |
|                                                | 1:1                     | 5.77                   | 90                      |           |
|                                                | 1:2                     | 1.75                   | 198                     |           |
| 1,4-butylenediamine                            | 1:0.5                   | 0.84                   | 87                      |           |
|                                                | 1:1                     | 4.71                   | 131                     |           |
|                                                | 1:2                     | 3.28                   | 219                     |           |
| 1,6-hexamethylenediamine                       | 1:0.5                   | 0.74                   | 71                      |           |
|                                                | 1:1                     | 3.80                   | 189                     |           |
|                                                | 1:2                     | 2.67                   | 207                     |           |
| 3-aminopropyl-terminated poly(ethylene glycol) | -                       | 3.17                   | 49                      | [2]       |
| 1,9-nonanediamine                              | 1:1                     | 3.40                   | 132                     | [3]       |
| 1,13-tridecanediamine                          | 1:1                     | 3.20                   | 128                     |           |
| Diethylene glycol bis(3-aminopropyl) ether     | 1:0.5                   | 0.85                   | 145                     | [4]       |
| Priamine <sup>TM</sup> 1074                    | 1:0.5                   | 0.92                   | 233                     | [5]       |
| 1,8-Menthane diamine                           | 1:0.8                   | 1.45                   | 108                     |           |
|                                                | 1:1                     | 2.20                   | 101                     |           |
|                                                | 1:1.2                   | 1.59                   | 106                     |           |
| 4,4-diaminodiphenyl methane                    | 1:0.8                   | 1.69                   | 117                     | [6]       |
|                                                | 1:1                     | 2.56                   | 142                     |           |
|                                                | 1:1.2                   | 2.02                   | 105                     |           |
| 4,4-diaminodiphenyl disulfide                  | 1:1                     | 1.99                   | 166                     | [7]       |
| m-Xylylenediamine                              | 1:1                     | 3.3                    | 200                     | [8]       |

## References of Table S1

1. Javni, I.; Hong, D.P.; Petrović, Z.S. Soy-based polyurethanes by nonisocyanate route. *J. Appl. Polym. Sci.* **2008**, *108*, 3867-3875.
2. Jalilian, S.; Yeganeh, H. Preparation and properties of biodegradable polyurethane networks from carbonated soybean oil. *Polym. Bull.* **2015**, *72*, 1379-1392.
3. Samanta, S.; Selvakumar, S.; Bahr, J.; Wickramaratne, D.S.; Sibi, M.; Chisholm, B.J. Synthesis and characterization of polyurethane networks derived from soybean-oil-based cyclic carbonates and bioderivable diamines. *ACS Sustainable Chem. Eng.* **2016**, *4*, 6551-6561.
4. Hu, S.; Chen, X.; Torkelson, J.M. Biobased reprocessable polyhydroxyurethane networks: Full recovery of crosslink density with three concurrent dynamic chemistries. *ACS Sustainable Chem. Eng.* **2019**, *7*, 10025-10034.
5. Liu, X.; Yang, X.; Wang, S.; Wang, S.; Wang, Z.; Liu, S.; Xu, X.; Liu, H.; Song, Z. Fully bio-based polyhydroxyurethanes with a dynamic network from a terpene derivative and cyclic carbonate functional soybean oil. *ACS Sustainable Chem. Eng.* **2021**, *9*, 4175-4184.
6. Yang, X.; Ren, C.; Liu, X.; Sun, P.; Xu, X.; Liu, H.; Shen, M.; Shang, S.; Song, Z. Recyclable non-isocyanate polyurethanes containing a dynamic covalent network derived from epoxy soybean oil and CO<sub>2</sub>. *Mater. Chem. Front.* **2021**, *5*, 6160-6170.
7. Yang, X.; Wang, S.; Liu, X.; Huang, Z.; Huang, X.; Xu, X.; Liu, H.; Wang, D.; Shang, S. Preparation of non-isocyanate polyurethanes from epoxy soybean oil: Dual dynamic networks to realize self-healing and reprocessing under mild conditions. *Green Chem.* **2021**, *23*, 6349-6355.
8. Seychal, G.; Ocando, C.; Bonnaud, L.; De Winter, J.; Grignard, B.; Detrembleur, C.; Sardon, H.; Aramburu, N.; Raquez, J.-M. Emerging polyhydroxyurethanes as sustainable thermosets: A structure–property relationship. *ACS Appl. Polym. Mater.* **2023**, *5*, 5567-5581.

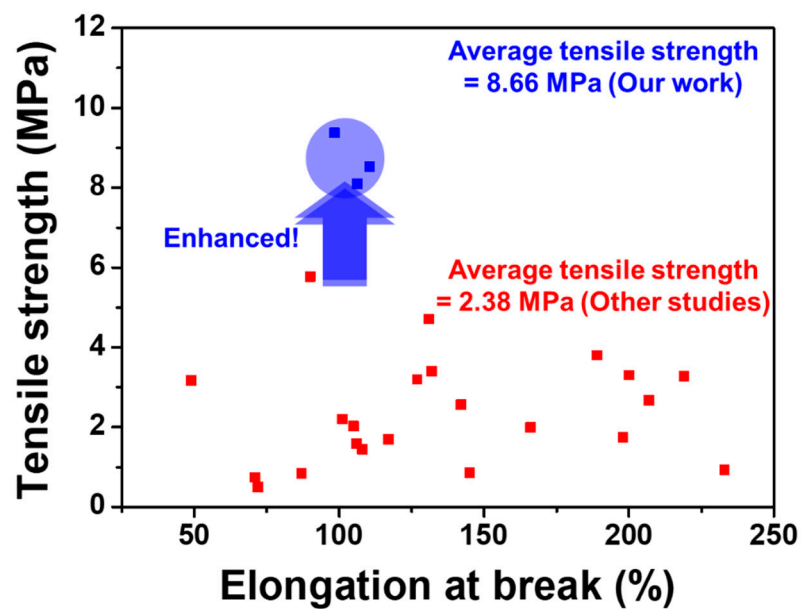

**Figure S1.** Tensile strength and elongation at break comparison of CSBO-based NIPU : Our work versus previous studies.

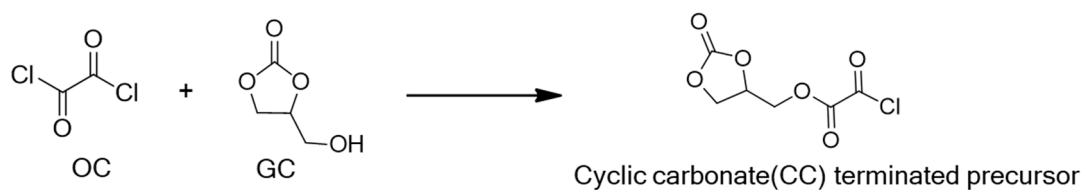

**Figure S2.** Schematic representation of the preparation of five-membered CC precursor.

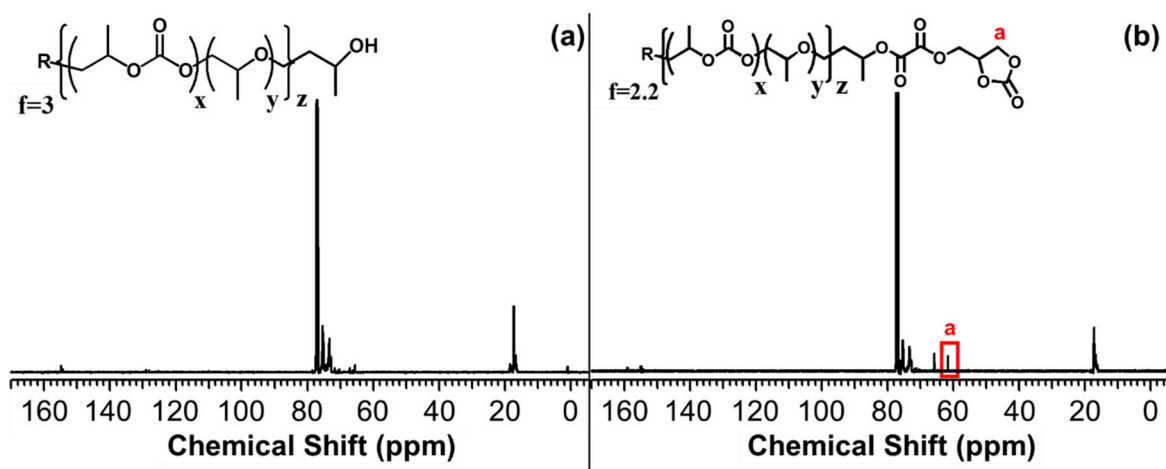

**Figure S3.**  $^{13}\text{C}$  NMR spectra of PEC polyol (a) and RCC (b).

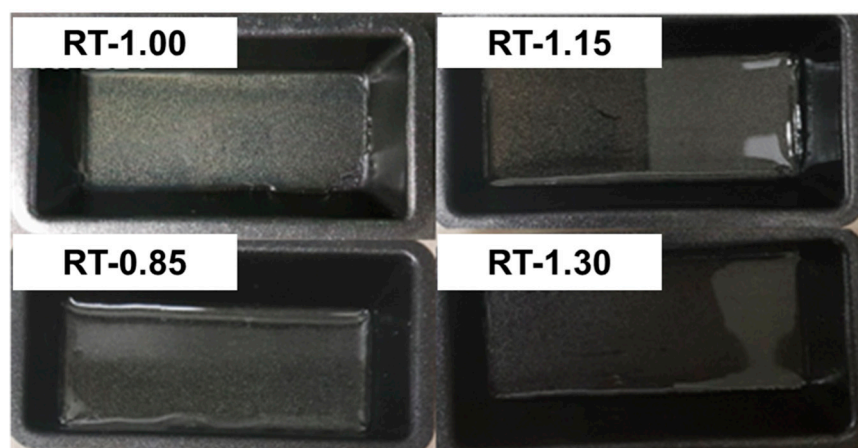

**Figure S4.** Visual appearances of RTs in iron mold.
